# Supplementary material for: Impact of nutritional indices on mortality in patients with heart failure
Source: PubMed Central journal article supplement (PMC5761292; doi:10.1136/openhrt-2017-000730), 2018-01-09
Supplement: openhrt-2017-000730supp001.pdf [file openhrt-2017-000730supp001.pdf]

**Supplementary Table 1. Comparisons of clinical features among PNI category (N=1108)**

|                                           | <b>Normal (n=874)</b> | <b>Moderate (n=94)</b> | <b>Severe (n=140)</b> | <b>P-value</b> |
|-------------------------------------------|-----------------------|------------------------|-----------------------|----------------|
| PNI score                                 | 47.7 ± 6.5            | 36.8 ± 3.9**           | 30.5 ± 3.8**††        | <0.001         |
| Age (years)                               | 65.3 ± 14.2           | 70.8 ± 15.8**          | 72.3 ± 14.7**         | <0.001         |
| Male gender (n, %)                        | 552 (63.2)            | 50 (53.2)              | 66 (47.1)             | 0.001          |
| Body mass index (kg/cm <sup>2</sup> )     | 23.5 ± 4.0            | 23.4 ± 4.7             | 22.9 ± 4.9            | 0.300          |
| Systolic blood pressure (mmHg)            | 126.9 ± 28.8          | 129.1 ± 31.4           | 130.4 ± 33.7          | 0.371          |
| Diastolic blood pressure (mmHg)           | 72.2 ± 19.2           | 72.8 ± 19.2            | 71.4 ± 21.3           | 0.851          |
| Heart rate (bpm)                          | 78.1 ± 22.8           | 85.0 ± 24.1*           | 91.6 ± 27.0**         | <0.001         |
| NYHA class III or IV (n, %)               | 20 (2.3)              | 2 (2.1)                | 11 (7.9)              | 0.004          |
| Ischemic etiology (n, %)                  | 222 (25.4)            | 24 (25.5)              | 40 (28.6)             | 0.800          |
| <b>Co-morbidity</b>                       |                       |                        |                       |                |
| Hypertension (n, %)                       | 626 (71.6)            | 66 (70.2)              | 98 (70.0)             | 0.005          |
| Diabetes (n, %)                           | 321 (36.7)            | 46 (48.9)              | 65 (46.4)             | 0.025          |
| Dyslipidemia (n, %)                       | 681 (77.9)            | 68 (72.3)              | 117 (83.6)            | 0.206          |
| Chronic kidney disease (n, %)             | 439 (50.2)            | 66 (70.2)              | 93 (66.4)             | <0.001         |
| Anemia (n, %)                             | 386 (44.2)            | 67 (71.3)              | 119 (85.0)            | <0.001         |
| Atrial fibrillation (n, %)                | 320 (36.6)            | 30 (31.9)              | 55 (39.3)             | 0.702          |
| <b>Laboratory data</b>                    |                       |                        |                       |                |
| Hemoglobin (g/dl)                         | 13.1 ± 2.1            | 11.6 ± 2.2**           | 10.3 ± 2.3**††        | <0.001         |
| Total lymphocyte count (mm <sup>3</sup> ) | 1633.3 ± 968.1        | 1074.2 ± 433.0**       | 884.2 ± 389.7**       | <0.001         |
| Total protein (g/dl)                      | 7.1 ± 0.6             | 6.5 ± 0.8**            | 6.0 ± 0.9**††         | <0.001         |
| Albumin (g/dl)                            | 4.0 ± 0.4             | 3.1 ± 0.2**            | 2.6 ± 0.4**††         | <0.001         |
| Sodium (mEq/l)                            | 139.4 ± 3.2           | 137.4 ± 4.8**          | 136.8 ± 5.1**         | <0.001         |
| eGFR (ml/min/1.73 cm <sup>2</sup> )       | 58.6 ± 22.9           | 44.7 ± 30.4**          | 46.6 ± 23.9**         | <0.001         |
| Total cholesterol (mg/dl)                 | 181.5 ± 37.9          | 163.5 ± 38.0**         | 148.0 ± 47.7**        | <0.001         |
| Log C-reactive protein (mg/dl)            | -0.77 ± 0.66          | -0.12 ± 0.76**         | 0.28 ± 0.69**††       | <0.001         |
| Log BNP (pg/ml)                           | 2.3 ± 0.6             | 2.8 ± 0.6**            | 2.7 ± 0.5**           | <0.001         |
| Log troponin I (ng/ml)                    | -1.2 ± 0.8            | -0.8 ± 0.9**           | -0.6 ± 0.9**††        | <0.001         |
| Log TNF-α (pg/ml)                         | 0.3 ± 0.4             | 0.3 ± 0.4              | 0.4 ± 0.4             | 0.712          |
| Log adiponectin (μg/ml)                   | 1.2 ± 0.3             | 1.4 ± 0.4              | 1.4 ± 0.2*            | 0.009          |
| <b>Echocardiography</b>                   |                       |                        |                       |                |
| LVEF (%)                                  | 42.7 ± 16.0           | 42.2 ± 14.9            | 42.4 ± 15.6           | 0.945          |
| RV-FAC (%)                                | 40.1 ± 12.3           | 42.9 ± 12.3            | 40.0 ± 11.2           | 0.408          |
| IVC (mm)                                  | 14.6 ± 4.6            | 16.2 ± 4.8             | 15.2 ± 5.6            | 0.074          |
| TRPG (mmHg)                               | 29.9 ± 16.8           | 32.8 ± 15.8            | 31.4 ± 14.4           | 0.386          |
| <b>Cardiopulmonary exercise test</b>      |                       |                        |                       |                |

|                                  |            |            |             |       |
|----------------------------------|------------|------------|-------------|-------|
| Peak VO <sub>2</sub> (ml/kg/min) | 16.0 ± 4.8 | 15.2 ± 4.5 | 13.5 ± 3.2* | 0.029 |
| VE/VCO <sub>2</sub> slope        | 34.2 ± 8.2 | 35.8 ± 9.0 | 36.8 ± 8.2  | 0.241 |

NYHA, New York Heart Association; eGFR, estimated glomerular filtration; BNP, B-type natriuretic peptide; TNF- $\alpha$ , tumor necrosis factor- $\alpha$ ; LVEF, left ventricular ejection fraction; RV-FAC, right ventricular fractional area change; IVC, inferior vena cava diameter; TRPG, tricuspid valve regurgitation; Peak VO<sub>2</sub>, breath-by-breath oxygen consumption; VE/VCO<sub>2</sub> slope, slope of the relationship between ventilation and carbon dioxide production. \*P<0.05 and \*\*P<0.01 vs. normal group, †P<0.05 and ††P<0.01 vs. moderate group.

**Supplementary Table 2. Comparisons of clinical features among GNRI category (N=1274)**

|                                           | <b>Normal<br/>(n=704)</b> | <b>Mild<br/>(n=229)</b> | <b>Moderate<br/>(n=227)</b> | <b>Severe<br/>(n=114)</b> | <b>P-value</b> |
|-------------------------------------------|---------------------------|-------------------------|-----------------------------|---------------------------|----------------|
| GNRI score                                | 107.9 ± 7.5               | 95.0 ± 1.7**            | 87.6 ± 2.7**                | 75.5 ± 5.5***†‡‡‡         | <0.001         |
| Age (years)                               | 63.6 ± 14.2               | 68.7 ± 13.0**           | 69.9 ± 14.6**               | 70.9 ± 16.1**             | <0.001         |
| Male gender (n, %)                        | 456 (64.8)                | 133 (58.1)              | 137 (60.4)                  | 53 (46.5)                 | 0.002          |
| Body mass index (kg/cm <sup>2</sup> )     | 25.3 ± 4.0                | 21.8 ± 2.7**            | 21.3 ± 2.9**                | 19.0 ± 2.9***†‡‡‡         | <0.001         |
| Systolic blood pressure (mmHg)            | 126.9 ± 26.8              | 127.8 ± 31.7            | 128.6 ± 32.4                | 124.6 ± 36.1              | 0.680          |
| Diastolic blood pressure (mmHg)           | 72.4 ± 18.2               | 74.3 ± 20.8             | 71.0 ± 20.2                 | 71.8 ± 21.6               | 0.315          |
| Heart rate (bpm)                          | 76.6 ± 20.9               | 80.4 ± 25.1             | 84.4 ± 25.2**               | 91.3 ± 27.7***††          | <0.001         |
| NYHA class III or IV (n, %)               | 10 (1.4)                  | 6 (2.6)                 | 7 (3.1)                     | 12 (10.5)                 | <0.001         |
| Ischemic etiology (n, %)                  | 183 (26.0)                | 55 (24.0)               | 67 (29.5)                   | 26 (22.8)                 | 0.470          |
| <b>Co-morbidity</b>                       |                           |                         |                             |                           |                |
| Hypertension (n, %)                       | 528 (75.0)                | 159 (69.4)              | 172 (75.8)                  | 73 (64.0)                 | 0.037          |
| Diabetes (n, %)                           | 270 (38.4)                | 86 (37.6)               | 100 (44.1)                  | 41 (36.0)                 | 0.361          |
| Dyslipidemia (n, %)                       | 565 (80.3)                | 173 (75.5)              | 169 (74.4)                  | 89 (78.1)                 | 0.207          |
| Chronic kidney disease (n, %)             | 351 (49.9)                | 122 (53.3)              | 142 (62.6)                  | 72 (63.2)                 | 0.001          |
| Anemia (n, %)                             | 269 (38.2)                | 127 (55.5)              | 172 (75.8)                  | 92 (80.7)                 | <0.001         |
| Atrial fibrillation (n, %)                | 256 (36.4)                | 90 (39.3)               | 80 (35.2)                   | 41 (36.0)                 | 0.817          |
| <b>Laboratory data</b>                    |                           |                         |                             |                           |                |
| Hemoglobin (g/dl)                         | 13.5 ± 2.0                | 12.5 ± 2.0**            | 11.5 ± 2.2***††             | 10.3 ± 2.2***†‡‡‡         | <0.001         |
| Total lymphocyte count (mm <sup>3</sup> ) | 1599.3 ± 952.0††          | 1456.7 ± 902.0††        | 1274.2 ± 688.4**            | 1057.0 ± 546.8**          | <0.001         |
| Total protein (g/dl)                      | 7.3 ± 0.6                 | 6.9 ± 0.6 **            | 6.6 ± 0.8***††              | 6.1 ± 1.0 ***†‡‡‡         | <0.001         |
| Albumin (g/dl)                            | 4.1 ± 0.4                 | 3.6 ± 0.3 **            | 3.2 ± 0.4 ***††             | 2.7 ± 0.5 ***†‡‡‡         | <0.001         |
| Sodium (mEq/l)                            | 139.8 ± 3.0               | 138.8 ± 3.4**           | 137.8 ± 4.3***†             | 137.1 ± 5.3***††          | <0.001         |
| eGFR (ml/min/1.73 cm <sup>2</sup> )       | 60.6 ± 23.1               | 55.3 ± 23.4             | 49.4 ± 25.6**               | 47.1 ± 25.7**             | <0.001         |
| Total cholesterol (mg/dl)                 | 184.8 ± 39.6              | 178.6 ± 37.8            | 166.1 ± 36.0**              | 141.2 ± 46.4***†‡‡‡       | <0.001         |
| Log C-reactive protein (mg/dl)            | 0.84 ± 0.61               | 0.58 ± 0.74**           | -0.26 ± 0.75***††           | 0.10 ± 0.76***†‡‡‡        | <0.001         |
| Log BNP (pg/ml)                           | 2.2 ± 0.6                 | 2.4 ± 0.5**             | 2.7 ± 0.5***††              | 2.8 ± 0.5***††            | <0.001         |
| Log troponin I (ng/ml)                    | -1.2 ± 0.7                | -1.0 ± 0.8*             | -0.9 ± 0.8**                | -0.6 ± 0.9***†‡‡‡         | <0.001         |
| Log TNF-α (pg/ml)                         | 0.3 ± 0.4                 | 0.3 ± 0.5               | 0.4 ± 0.5                   | 0.4 ± 0.4                 | 0.066          |
| Log adiponectin (μg/ml)                   | 1.1 ± 0.3                 | 1.3 ± 0.3**             | 1.4 ± 0.2**                 | 1.4 ± 0.3**               | <0.001         |

---

**Echocardiography**

|             |             |             |             |             |       |
|-------------|-------------|-------------|-------------|-------------|-------|
| LVEF (%)    | 43.1 ± 15.9 | 40.1 ± 16.8 | 41.4 ± 14.7 | 41.0 ± 16.5 | 0.082 |
| RV-FAC (%)  | 40.8 ± 12.1 | 41.1 ± 11.5 | 38.9 ± 13.7 | 40.6 ± 10.9 | 0.570 |
| IVC (mm)    | 14.6 ± 4.5  | 15.3 ± 5.6  | 15.1 ± 5.1  | 14.4 ± 4.8  | 0.264 |
| TRPG (mmHg) | 29.0 ± 15.4 | 30.2 ± 16.8 | 32.7 ± 18.5 | 31.4 ± 13.8 | 0.089 |

---

**Cardiopulmonary exercise test**

|                                  |            |              |              |            |        |
|----------------------------------|------------|--------------|--------------|------------|--------|
| Peak VO <sub>2</sub> (ml/kg/min) | 16.4 ± 4.6 | 15.1 ± 5.3   | 14.8 ± 4.5   | 13.9 ± 3.0 | 0.004  |
| VE/VCO <sub>2</sub> slope        | 32.9 ± 7.4 | 36.2 ± 8.4** | 37.0 ± 9.5** | 34.9 ± 6.6 | <0.001 |

---

NYHA, New York Heart Association; eGFR, estimated glomerular filtration; BNP, B-type natriuretic peptide; TNF- $\alpha$ , tumor necrosis factor- $\alpha$ ; LVEF, left ventricular ejection fraction; RV-FAC, right ventricular fractional area change; IVC, inferior vena cava diameter; TRPG, tricuspid valve regurgitation; Peak VO<sub>2</sub>, breath-by-breath oxygen consumption; VE/VCO<sub>2</sub> slope, slope of the relationship between ventilation and carbon dioxide production.

\*P<0.05 and \*\*P<0.01 vs. normal group, †P<0.05 and ††P<0.01 vs. mild group, ‡P<0.05 and ‡‡P<0.01 vs. moderate group.

**Supplementary Table 3. Comparisons of clinical features among CONUT score category (N=710)**

|                                           | Normal (n=262)  | Mild (n=305)     | Moderate-Severe (n=143) | P-value |
|-------------------------------------------|-----------------|------------------|-------------------------|---------|
| CONUT score                               | 0.6 ± 0.5       | 2.8 ± 0.8**      | 6.7 ± 1.9**††           | <0.001  |
| Age (years)                               | 62.2 ± 13.5     | 67.1 ± 13.4**    | 71.0 ± 14.8**††         | <0.001  |
| Male gender (n, %)                        | 169 (64.5)      | 204 (66.9)       | 76 (53.1)               | 0.017   |
| Body mass index (kg/cm <sup>2</sup> )     | 24.1 ± 4.1      | 23.1 ± 3.8*      | 22.8 ± 5.0**            | 0.003   |
| Systolic blood pressure (mmHg)            | 123.0 ± 22.7    | 122.5 ± 26.7     | 130.4 ± 32.3*††         | 0.008   |
| Diastolic blood pressure (mmHg)           | 69.6 ± 14.8     | 69.8 ± 18.1      | 71.9 ± 19.1             | 0.403   |
| Heart rate (bpm)                          | 74.6 ± 19.6     | 75.0 ± 19.0      | 86.2 ± 24.4**††         | <0.001  |
| NYHA class III or IV (n, %)               | 3 (1.1)         | 8 (2.6)          | 8 (5.6)                 | 0.030   |
| Ischemic etiology (n, %)                  | 51 (19.5)       | 78 (25.6)        | 35 (24.5)               | 0.207   |
| <b>Co-morbidity</b>                       |                 |                  |                         |         |
| Hypertension (n, %)                       | 164 (62.6)      | 209 (68.5)       | 96 (67.1)               | 0.316   |
| Diabetes (n, %)                           | 82 (31.3)       | 119 (39.0)       | 71 (49.7)               | 0.001   |
| Dyslipidemia (n, %)                       | 212 (80.9)      | 233 (76.4)       | 109 (76.2)              | 0.364   |
| Chronic kidney disease (n, %)             | 111 (42.4)      | 166 (54.4)       | 91 (63.6)               | <0.001  |
| Anemia (n, %)                             | 65 (24.8)       | 151 (49.5)       | 107 (74.8)              | <0.001  |
| Atrial fibrillation (n, %)                | 93 (35.5)       | 118 (38.7)       | 55 (38.5)               | 0.709   |
| <b>Laboratory data</b>                    |                 |                  |                         |         |
| Hemoglobin (g/dl)                         | 14.0 ± 1.6      | 12.7 ± 1.9 **    | 11.0 ± 2.3**††          | <0.001  |
| Total lymphocyte count (mm <sup>3</sup> ) | 2061.5 ± 1211.1 | 1229.1 ± 451.6** | 931.3 ± 375.2**††       | <0.001  |
| Total protein (g/dl)                      | 7.3 ± 0.6       | 7.0 ± 0.6 **     | 6.3 ± 0.9 **††          | <0.001  |
| Albumin (g/dl)                            | 4.2 ± 0.4       | 3.9 ± 0.4 **     | 2.9 ± 0.5 **††          | <0.001  |
| Sodium (mEq/l)                            | 140.4 ± 2.5     | 139.1 ± 3.5      | 137.4 ± 5.1**††         | <0.001  |
| eGFR (ml/min/1.73 cm <sup>2</sup> )       | 63.2 ± 19.9     | 54.7 ± 23.1**    | 47.8 ± 24.9**†          | <0.001  |
| Total cholesterol (mg/dl)                 | 198.8 ± 33.9    | 172.9 ± 35.0**   | 143.3 ± 38.0**††        | <0.001  |
| Log C-reactive protein (mg/dl)            | -0.97 ± 0.49    | -0.74 ± 0.67**   | 0.001 ± 0.71**††        | <0.001  |
| Log BNP (pg/ml)                           | 2.1 ± 0.5       | 2.3 ± 0.6**      | 2.8 ± 0.5**††           | <0.001  |
| Log troponin I (ng/ml)                    | -1.4 ± 0.5      | -1.3 ± 0.7*      | -1.0 ± 0.8**††          | <0.001  |
| Log TNF-α (pg/ml)                         | 0.2 ± 0.2       | 0.2 ± 0.2        | 0.4 ± 0.4*†             | 0.011   |
| Log adiponectin (μg/ml)                   | 1.0 ± 0.3       | 1.1 ± 0.3        | 1.4 ± 0.2**††           | <0.001  |
| <b>Echocardiography</b>                   |                 |                  |                         |         |
| LVEF (%)                                  | 44.6 ± 16.2     | 42.2 ± 16.0      | 41.1 ± 15.7             | 0.077   |
| RV-FAC (%)                                | 40.9 ± 11.4     | 40.2 ± 12.5      | 41.5 ± 14.2             | 0.763   |
| IVC (mm)                                  | 13.9 ± 3.8      | 14.6 ± 4.5       | 16.0 ± 6.1              | <0.001  |
| TRPG (mmHg)                               | 29.5 ± 18.4     | 30.0 ± 16.0      | 34.8 ± 17.8             | 0.038   |
| <b>Cardiopulmonary exercise test</b>      |                 |                  |                         |         |

|                                  |            |            |            |       |
|----------------------------------|------------|------------|------------|-------|
| Peak VO <sub>2</sub> (ml/kg/min) | 16.2 ± 4.3 | 15.4 ± 4.4 | 14.7 ± 4.0 | 0.195 |
| VE/VCO <sub>2</sub> slope        | 34.4 ± 7.7 | 34.5 ± 9.2 | 36.2 ± 8.1 | 0.557 |

NYHA, New York Heart Association; eGFR, estimated glomerular filtration; BNP, B-type natriuretic peptide; TNF- $\alpha$ , tumor necrosis factor- $\alpha$ ; LVEF, left ventricular ejection fraction; RV-FAC, right ventricular fractional area change; IVC, inferior vena cava diameter; TRPG, tricuspid valve regurgitation; Peak VO<sub>2</sub>, breath-by-breath oxygen consumption; VE/VCO<sub>2</sub> slope, slope of the relationship between ventilation and carbon dioxide production.

\*P<0.05 and \*\*P<0.01 vs. normal group, †P<0.05 and ††P<0.01 vs. mild group.
